# Supplementary material
Source: Springer Nature journal article supplement (https://www.springermedizin.de/resource/supplementary/13046_2011_521_MOESM1_ESM.pdf/9662182)

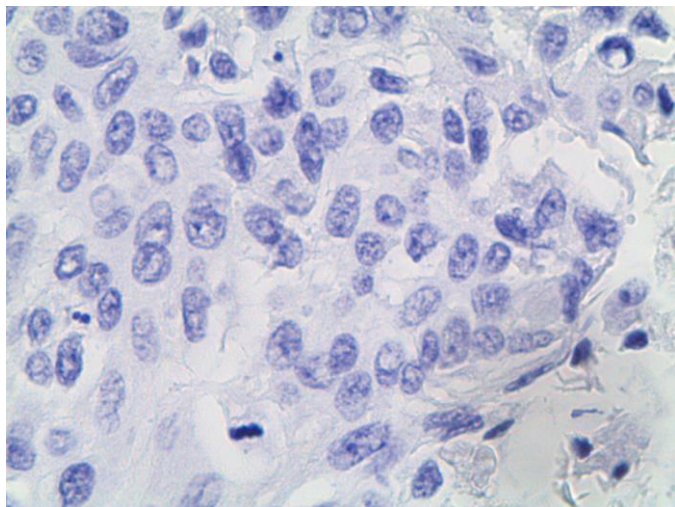

A.

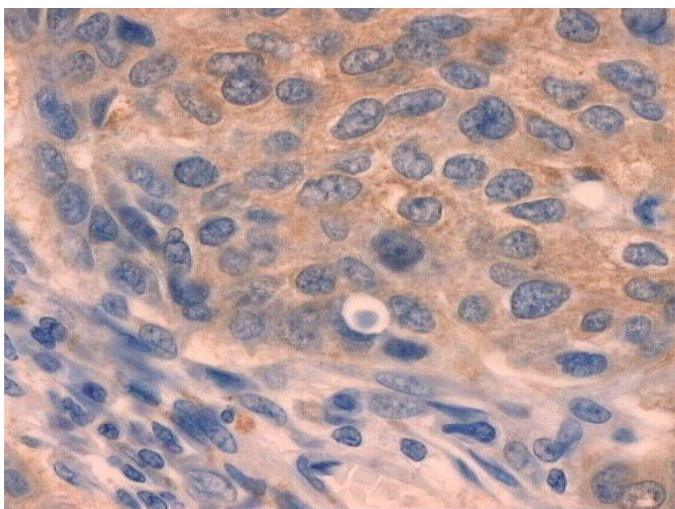

B.

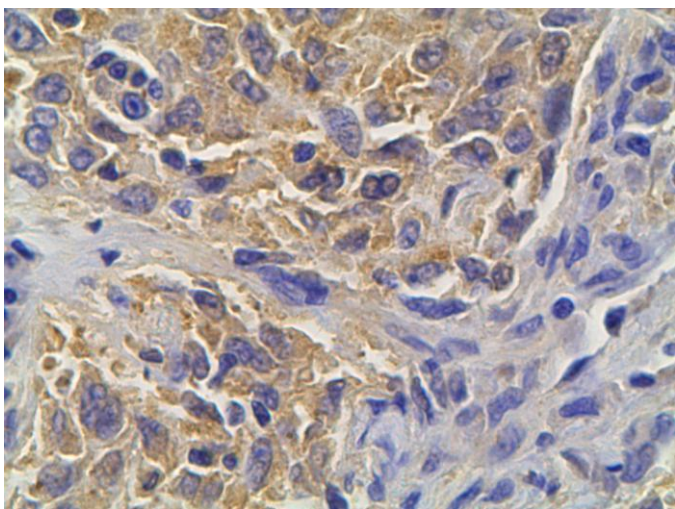

C.

Supplement: MOESM1 [file 9662182]
